# Supplementary material
Source: HighWire-hosted journal article supplement (https://bmjopen.bmj.com/content/10/10/e039887)
Supplement: inline-supplementary-material-1 [file inline-supplementary-material-1.pdf]

Table S1: Clinical management of patients with COVID-19 during hospital stay

| Category              | Clinical management                    | All<br>(N=625) | Age group, n(%)                   |                                                |                                                 |                                  | P-value* | P-value** |
|-----------------------|----------------------------------------|----------------|-----------------------------------|------------------------------------------------|-------------------------------------------------|----------------------------------|----------|-----------|
|                       |                                        |                | Children<br>(≤18 years)<br>(N=37) | Young<br>adulthood<br>(19-44 years)<br>(N=261) | Middle<br>adulthood<br>(45-64 years)<br>(N=248) | Elderly<br>(≥65 years)<br>(N=79) |          |           |
| Supportive treatments | Inotropic and vasoconstrictive agents  | 5(0.8%)        | 0(0.0%)                           | 0(0.0%)                                        | 1(0.4%)                                         | 4(5.1%)                          | 0.0018   | 0.0063    |
|                       | Nasal cannula                          | 221(35.4%)     | 5(13.5%)                          | 76(29.1%)                                      | 103(41.5%)                                      | 37(46.8%)                        | <.0001   | <.0001    |
|                       | Mask                                   | 14(2.2%)       | 0(0.0%)                           | 2(0.8%)                                        | 6(2.4%)                                         | 6(7.6%)                          | 0.0090   | 0.0041    |
|                       | High-flow nasal cannula oxygen therapy | 25(4.0%)       | 0(0.0%)                           | 4(1.5%)                                        | 11(4.4%)                                        | 10(12.7%)                        | 0.0005   | 0.0001    |
|                       | Non-invasive ventilation               | 34(5.4%)       | 0(0.0%)                           | 2(0.8%)                                        | 16(6.5%)                                        | 16(20.3%)                        | <.0001   | <.0001    |
|                       | Invasive mechanical ventilation        | 5(0.8%)        | 0(0.0%)                           | 0(0.0%)                                        | 1(0.4%)                                         | 4(5.1%)                          | 0.0018   | 0.0038    |
|                       | Prone position                         | 18(2.9%)       | 0(0.0%)                           | 2(0.8%)                                        | 8(3.2%)                                         | 8(10.1%)                         | 0.0008   | 0.0010    |
|                       | Continuous renal replacement therapy   | 1(0.2%)        | 0(0.0%)                           | 0(0.0%)                                        | 0(0.0%)                                         | 1(1.3%)                          | 0.1856   | 0.0999    |
|                       | Extracorporeal membrane oxygenation    | 2(0.3%)        | 0(0.0%)                           | 0(0.0%)                                        | 1(0.4%)                                         | 1(1.3%)                          | 0.2313   | 0.0951    |
| Medical drugs         | Traditional Chinese medicine           | 98(15.7%)      | 0(0.0%)                           | 26(10.0%)                                      | 49(19.8%)                                       | 23(29.1%)                        | <.0001   | <.0001    |
|                       | Immunoglobulin                         | 156(25.0%)     | 2(5.4%)                           | 40(15.3%)                                      | 79(31.9%)                                       | 35(44.3%)                        | <.0001   | <.0001    |
|                       | Interferon                             | 503(80.5%)     | 28(75.7%)                         | 209(80.1%)                                     | 205(82.7%)                                      | 61(77.2%)                        | 0.5612   | 0.9408    |
|                       | Antioxidants                           | 152(24.3%)     | 4(10.8%)                          | 49(18.8%)                                      | 71(28.6%)                                       | 28(35.4%)                        | 0.0012   | <.0001    |
|                       | Glucocorticoid                         | 142(22.7%)     | 1(2.7%)                           | 40(15.3%)                                      | 70(28.2%)                                       | 31(39.2%)                        | <.0001   | <.0001    |
|                       | Thymosin                               | 144(23.0%)     | 1(2.7%)                           | 37(14.2%)                                      | 74(29.8%)                                       | 32(40.5%)                        | <.0001   | <.0001    |
|                       | Neurotrophic drugs                     | 102(16.3%)     | 1(2.7%)                           | 32(12.3%)                                      | 48(19.4%)                                       | 21(26.6%)                        | 0.0008   | <.0001    |
|                       | Any antibiotics                        | 336(53.8%)     | 5(13.5%)                          | 136(52.1%)                                     | 142(57.3%)                                      | 53(67.1%)                        | <.0001   | <.0001    |
|                       | Any antivirals                         | 580(92.8%)     | 25(67.6%)                         | 245(93.9%)                                     | 234(94.4%)                                      | 76(96.2%)                        | <.0001   | <.0001    |

\* P value from testing differences in proportions among different age groups

\*\* P value from trend test of linear age effect in generalised linear model in which age (year) was included as only predictor.
